# Supplementary material
Source: HighWire-hosted journal article supplement (doi:10.1101/rna.079104.122)
Supplement: Supplemental_Figure_and_Table_Legends.docx [file Supplemental_Figure_and_Table_Legends.docx]

**Supplementary Figures and Tables**

**Figure S1. Genome browser tracks of endogenous 5’SS motif containing transcripts**

(A-C) Selected examples of IPA transcripts upregulated following ZFC3H1-depletion in total RNA samples. The intronic 3’cleavage/polyadenylation site is denoted by the red arrows.

(D-E) Selected example of PROMPTs (“*proGGNBP2*” and “*proLZTR1*”) that are upregulated following ZFC3H1-depletion. The PROMPTs are denoted by a red arrow. Note that following ZFC3H1 depletion, “*proLZTR1*” is more cytoplasmic.

**Figure S2. ZFC3H1-depletion leads to nuclear localization of mRNAs with long 3’ UTRs**

(A) Schematic depicting alternative polyadenylation. If the proximal polyadenylation site (PAS) is used, this generates a short UTR isoform. If the distal PAS is used, this generates a long 3’ UTR isoform. Note that regions of the 3’UTR that are found only when the distal site is used are labeled in red (“long UTR”) while regions common to both short and long isoforms are labeled in blue (“cUTR”).

(B) Violin plots of the log2 change in cytoplasmic/nuclear ratio of mRNAs following ZFC3H1-depletion (“shZFC v CTRL C/N”) compared between reads mapping to long UTR regions (red regions in (A)), cUTR regions (blue regions in (A)) and all mRNA regions. Note that reads from long UTRs, which are generated from distal PASs, are more nuclear following ZFC3H1-depletion than reads mapping to cUTR or mRNAs in general.

(C-E) The nuclear (*y-axis*)- cytoplasmic (*x-axis*) distribution of (C) long, (D) cUTR and (E) short UTRs following ZFC3H1-depletion. Each data point represents reads from a separate gene. See methods for how levels of short UTR reads were inferred. Note that ZFC3H1-depletion leads to nuclear retention of mRNAs with long UTRs (compare red dots to blue in (C)). This is not observed for short UTRs in (E). To eliminate the contribution of long UTRs from cUTR reads, we estimated reads that corresponds to only the short UTRs.

(F-H) Similar to (C-E), except the cytoplasmic/nuclear ratio (*x-axis*) was compared to total RNA (*y-axis*). Note that the change in cytoplasmic/nuclear ratio for long UTR reads was much more pronounced than the change in total levels.

**Figure S3. Analysis of nuclear and cytoplasmic levels of 3’UTR reads upon ZFC3H1-depletion**

(A-B) Similar to Supplemental Figure S2C, except that the (A) cytoplasmic or (B) nuclear long UTR reads (*x-axis*) were plotted against total reads (*y-axis*) following ZFC3H1-depletion.

(C-D) Similar to Supplemental Figure S2D, except that the (C) cytoplasmic or (D) nuclear long UTR reads (*x-axis*) were plotted against total reads (*y-axis*) following ZFC3H1-depletion.

(E-F) Similar to Supplemental Figure S2E, except that the (E) cytoplasmic or (F) nuclear long UTR reads (*x-axis*) were plotted against total reads (*y-axis*) following ZFC3H1-depletion.

**Figure S4. Normalized total RNA Fluorescence for mRNA nuclear export**

(A) Related to Figure 2D, ZFC3H1-depletion (but not U1-70K depletion) leads to increased total *ftz* reporter RNA levels compared to control-depleted cells.

(B) Related to Figure 2H, ZFC3H1-depletion leads to increased *CCDC71-IPA* reporter RNA levels, also see Figure 1H.

(C) Related to Figure S5C, ZFC3H1-depletion leads to increased total *PCF11-IPA* reporter RNA levels compared to control depleted cells.

(D) Related to Figure S6D, PABPN1-depletion decreases total *ftz* reporter RNA levels compared to control-depleted cells.

(E) Related to Figure 3C, co-depletion of U1-70K and ZFC3H1 leads to increased total *ftz* reporter RNA levels compared to control-depleted cells.

(F) Related to Figure 5D, disruption of nuclear speckles (by GFP-CLK3 overexpression) leads to increased total *ftz* reporter RNA levels compared to cells co-expressing H1B-GFP.

In all graphs each bar is the average and standard error of at least three independent experiments, except \ for *ftz-Δi* in (F) where only two experiments were performed.

**Figure S5. Depletion of ZFC3H1 perturbs the nuclear retention of *PCF11-IPA* (5’SS motif containing) reporter RNA**

(A) Schematic of the *PCF11-IPA* reporter used in this study. The position of the FISH probe used to visualize the reporter RNA is marked in grey and the position of the 3’ cleavage site in the intron is as indicated.

(B) U2OS cells were transfected with the *PCF11-IPA* reporter and the RNA was visualized by FISH, and co-stained for the nuclear speckle marker SC35 by immunofluorescence. Representative images are shown with merged overlays showing the *PCF11-IPA* mRNA in red and SC35 in green. Scale bar = 10 µM. Examples of *PCF11-IPA*/SC35 co-localization are indicated with arrows.

(C-D) Control- and ZFC3H1-depleted cells were transfected with the *PCF11-IPA* reporter. Representative images are shown in (C), scale bar = 10 µm, and quantification is shown in (D). Note that ZFC3H1-depletion leads to the partial cytoplasmic accumulation of the *CCDC71-IPA*. Each bar represents the average and standard error of at least four independent experiments, each experiment consisting of at least 30 to 60 cells. Student t-test was performed, ** *p* < 0.01.

**Figure S6. PABPN1-depletion has a minor effect on the nuclear retention of 5’SS motif containing mRNAs**

(A) U2OS cells were treated with two different lentivirus shRNAs against PABPN1 (“PABPN1-1” and “PABPN1-2”). Lysates were collected after 72 to 96 hours, separated by SDS-PAGE and immunoprobed for PABPN1 and mAb414, which recognizes FG-containing Nups (Davis and Blobel 1986).

(B) Schematic of the *ftz* reporter constructs used.

(C-D) Control- or PABPN1-depleted U2OS cells were transfected with the *ftz* reporter +/- the 5’SS motif +/- the *ftz* intron (i). After 18-24 hours the cells were fixed, stained for *ftz*, imaged (C) and the cytoplasmic/nuclear ratios were quantified (D). Each bar represents the average and standard error of at least three independent experiments, each experiment consisting of 30 to 60 cells. Student t-test was performed with *** denoting *p* < 0.001, N.S. not significant. Note that PABPN1-depletion reduced the cytoplasmic level of the control *ftz-Δi* mRNA but did not significantly affect the localization of the 5’SS-containing *ftz* reporters. Scale bar = 10 µM.

**Figure S7. ZFC3H1 and U1-70K are not required for the trafficking 5’SS motif containing mRNAs to nuclear speckles**

Control, U1-70K-, or ZFC3H1-depleted U2OS cells were microinjected with plasmids containing the *βG-Δi +/- 5’SS* (A) or *ftz-Δi +/- 5’SS* (B) reporter plasmids. After the indicated times, the cells were fixed and stained for *βG* or *ftz* mRNA by FISH and for the nuclear speckle marker SC35 by immunofluorescence.

(A-B) Quantification of the degree of *βG*/SC35 (A) or *ftz*/SC35 (B) co-localization in cells depleted of U1-70K (A), ZFC3H1 (B) or after control shRNA-treatment by Pearson correlation coefficient analysis. Each bar represents the average and standard error of three independent experiments, each experiment consisting of 150 to 200 nuclear speckles from 15-20 cells. Note that depletion of either ZFC3H1 or U1-70K did not affect the targeting of mRNAs to nuclear speckles.

**Figure S8. Disruption of nuclear speckles does not affect nuclear export of *ftz-Δi* mRNAs**

(A) U2OS cells were co- transfected with *ftz-Δi* and GFP-CLK3 or H1B-GFP. 18 to 24 hours post-transfection, cells were fixed and stained for *ftz* mRNA by FISH and for the speckle marker SC35 by immunofluorescence. Representative images, with each row depicting a single field of view imaged for GFP, *ftz* mRNA and SC35 is shown in (A). Scale bar = 10 µM. (B) U2OS cells were transfected with *ftz-Δi-5’SS* or *ftz-Δi* alone (“-“) or with either GFP-CLK3, or H1B-GFP. 24 hours post-transfection, cells were fixed and stained for *ftz* mRNA by FISH and for the speckle marker SC35 by immunofluorescence and the nuclear speckle morphology was visually inspected and quantified for each cell. Untransfected cells were also quantified to determine the morphology of nuclear speckles without any exogenously expressed mRNAs of GFP-tagged proteins. Each bar represents the average and standard error of two (*ftz-Δi*) or four (*ftz-Δi-5’SS*) independent experiments, each consisting of 30-50 cells.

**Supplementary Table 1. List of IPA Transcripts Analyzed.**
