# Supplementary material
Source: HighWire-hosted journal article supplement (doi:10.1101/rna.079104.122)
Supplement: SupplTable1.xlsx [file SupplTable1.xlsx]

## Sheet: Sheet1
gene_symbol	Normalized IPA-Cyto Log2	Normalized IPA-Nuc Log2	ZFC vs Cont Normalized IPA total
ABCC5	0.825113	1.49732	0.985763
ABI2	-0.916705	1.62182	0.353471
ACO2	2.38601	2.30563	1.32068
ACOX1	2.75106	3.04343	2.39944
ACSS2	0.138745	-0.0569671	-0.29328
ACTR10	-0.32409	-0.0699299	-0.542468
ADD1	-0.138317	0.388688	-0.0904606
ADGRA3	-0.151718	-0.242187	-0.937898
ADGRL1	0.841625	0.436417	-1.39122
ADK	-0.170425	0.0287121	0.317775
ADORA2B	0.367125	0.253065	0.713091
AFG3L2	0.0512717	0.170668	0.0285236
AGAP1	1.03734	-0.0379994	-0.469486
AGAP3	0.533559	-0.102013	0.340837
AGBL5	-0.00973162	0.312178	0.571763
AIG1	0.953776	-0.19376	-0.321245
AK2	0.214687	0.299953	0.330703
AKR1A1	-0.258067	-0.126699	-0.356069
ALG13	0.177979	0.482246	0.125125
ALG14	1.49426	1.0817	1.15854
ALG8	0.999506	0.302095	0.713583
ALKBH1	1.27487	1.48915	1.31579
AMMECR1	4.07386	2.76539	2.43303
ANGEL2	0.00712145	0.969677	-1.35824
ANKHD1	0.61846	-0.340016	0.234044
ANKRD11	-0.53474	-0.396599	-0.490024
ANP32A	0.219545	0.978361	1.89763
ANTXR1	1.02503	0.458379	0.980071
ANXA2	0.274774	0.371904	-0.390251
AP3D1	-0.132381	-0.191896	0.0917297
AP5M1	0.908928	0.746594	1.03416
APBB2	-0.201669	-0.464298	-0.178068
APOLD1	3.10509	1.32767	1.29583
APP	0.258109	0.517535	0.919874
ARHGEF28	0.337641	0.876352	1.08002
ARHGEF37	4.32585	2.22764	3.25233
ARID1A	2.32975	2.01607	2.26942
ARL15	1.87266	1.95973	1.60944
ARL3	1.00017	1.20662	1.35737
ARMC8	-1.05736	-1.07352	-0.548956
ARPC4-TTLL3	0.376271	-0.275577	0.339914
ASPH	3.82803	3.00076	3.14286
ASPSCR1	0.443312	0.236848	0.227535
ATE1	0.719693	1.5341	-0.0680587
ATP5C1	0.28189	0.00671919	0.552023
ATP5J2	-0.318893	-0.156589	-0.387731
ATP6V1D	-0.190265	-0.0553276	-0.43579
ATPAF1	-2.07136	1.78903	-0.0498784
ATRAID	-0.114198	-1.03521	-0.0168612
ATXN2	0.480953	0.0506	0.0983698
AVL9	-0.188851	-0.556966	-0.597098
AXL	-0.419922	0.0977418	-0.270036
AZI2	0.65832	-0.531078	0.241976
AZIN2	1.88482	1.672	0.445955
B4GALT2	-0.5517	-0.332963	-0.341081
BAG3	0.459163	-0.108543	0.654988
BAHCC1	3.1097	2.3502	1.81339
BAZ2B	1.63007	2.03661	1.83226
BBS7	0.119262	0.57527	0.283129
BCAP29	0.52654	-1.29201	-0.391251
BCL11A	2.52825	1.77581	1.27497
BCL2	-0.14206	0.0389111	-0.409454
BFAR	0.0990327	-0.438574	0.124953
BMS1	-0.601988	0.253162	-0.0475688
BPTF	0.59303	0.531476	0.861203
BRCC3	0.645764	0.146537	0.440619
BRD3	5.09154	4.8115	5.14808
BRD4	-0.0261868	-0.807308	-0.981009
BRPF3	1.22859	-0.175814	0.798154
BTD	0.157868	1.05523	0.574396
BUB1	-0.711722	0.00929303	-0.500165
C12orf29	2.3505	1.39322	0.90302
C14orf2	-0.156492	0.287283	-0.103292
C18orf25	-0.301454	-0.197032	0.00474137
C18orf54	0.883318	0.677755	-0.0892112
C21orf33	-0.762451	0.735486	0.880333
C2orf68	0.109749	0.608814	0.184128
C5orf34	2.50324	1.44307	3.6717
C5orf38	0.692869	0.0991582	0.459044
CA8	0.531754	0.598956	0.183231
CACFD1	0.932939	1.90377	1.09119
CACNB1	-0.57228	2.65232	-2.54623
CAMK1D	-0.254266	0.133378	0.237022
CAMK2D	-0.611631	-1.60396	0.551157
CAMK2G	1.30967	0.705209	1.61476
CAMSAP2	1.22406	0.168977	1.23164
CAPRIN1	0.238413	0.229109	0.287312
CAPZA1	1.07241	0.238433	-0.539793
CASZ1	-0.63613	-1.521	0.033906
CCDC122	3.80497	2.76352	0.643934
CCDC71	5.54948	3.96582	4.47106
CCDC88A	-0.842213	-0.0205533	0.363911
CCM2	3.767	2.73407	2.92336
CCNI	-0.417442	-0.655987	-0.458874
CCPG1	-0.994694	0.0278423	-0.164091
CD44	0.264245	-0.0519475	-0.276228
CD47	1.73744	2.09064	2.01717
CDAN1	-0.0248263	0.220226	-0.216657
CDC42BPB	0.37005	-0.643932	0.104975
CDC45	-0.107293	0.348191	-0.372174
CDK13	1.23879	0.150116	0.12061
CDK14	-0.0206056	0.299038	-0.547945
CDK6	-0.807165	-0.631241	-0.260128
CDKN2AIPNL	2.34758	1.58421	2.38603
CDS2	0.342447	0.296868	-0.187027
CEP250	-1.97259	-0.471817	-0.137825
CEP55	0.169834	-0.449219	0.555279
CEP57L1	0.677424	-2.43623	0.679499
CERK	0.922823	0.58254	0.225075
CHCHD3	1.23007	0.7617	1.0975
CHD2	2.71554	2.18226	1.38958
CHD3	1.47814	0.415046	0.595256
CHD4	0.749615	-0.734409	0.111214
CIT	0.109471	-0.606458	-1.706
CLIP4	0.164639	-0.170875	0.245117
CLTC	-1.17411	0.279491	0.63883
CMIP	1.18998	1.56398	1.99003
CMSS1	0.156265	-0.039737	-0.33179
CNOT10	-0.433753	-0.117366	-0.0249135
CNOT3	1.26854	1.56247	1.58292
CNOT6	0.500547	0.296886	0.17426
CNOT7	0.500594	0.931677	0.0415828
CNTFR	1.10988	1.98893	2.14015
COBL	0.713919	0.16171	1.88893
COG3	1.41354	0.701844	0.967119
COG4	0.506138	0.373779	0.348587
COL12A1	1.56437	1.55936	1.34934
COL27A1	-0.0899054	-0.132173	-0.248403
COL5A1	0.808174	-0.207514	1.54074
COL9A2	0.632901	2.09842	-0.0291482
CPE	2.94199	1.68436	1.3023
CRAT	0.516316	-0.403569	1.05075
CREB1	5.78752	4.53162	4.04076
CREM	-0.994898	-0.286008	-1.09141
CRK	0.462373	-0.486768	-0.152885
CRLF3	0.470128	0.557465	0.000392827
CRTC3	-0.539532	-0.0168184	-0.474358
CSF1	-0.224066	0.167085	0.11514
CSNK1A1	0.105353	0.108266	0.228078
CSTF2	-0.254761	-0.264192	0.0704786
CSTF3	3.33704	2.85974	2.07163
CTNNBIP1	3.77441	3.57948	3.42067
CUL4A	-0.405814	-0.339256	0.42809
CUL9	-0.220023	0.29913	-1.1915
CXCL12	1.05651	-0.88941	-1.18441
CYB561A3	2.40231	3.03622	2.69487
CYHR1	-0.147089	0.270252	0.0674357
DAP	4.05834	3.20576	3.2122
DBF4	-0.515199	0.694722	-0.959213
DCAF1	-0.0252866	-0.0194067	-0.147339
DCBLD2	0.304426	0.0293297	-0.0637564
DDHD2	1.02521	0.375627	-0.756445
DENND1A	3.78523	3.47011	2.32939
DESI2	2.22243	1.2214	1.33726
DIDO1	0.285674	0.160932	1.70008
DLGAP1	2.70296	-0.31732	-0.599347
DLGAP4	-0.166073	-0.108891	2.07458
DNAJA3	0.850467	1.30787	0.851558
DNM1	0.0542296	-0.209756	-0.47009
DOCK1	0.406182	-0.0142961	-0.31408
DOCK6	1.34861	1.44383	-0.125997
DOCK7	-0.0109025	0.0696935	0.0761348
DRAM2	-0.472887	-0.177125	0.537156
DSE	0.516269	-0.180675	0.748056
DTNA	0.722782	0.570356	0.149784
DTNB	0.525021	-0.43504	0.81401
DTWD1	-1.09452	0.412436	-0.591035
DZIP1	0.425408	-0.171566	-2.19448
EFCAB11	0.385347	0.674299	0.932867
EGFR	1.19569	1.00252	1.08291
EGLN1	0.0508696	0.68351	-0.628483
EIF2S2	1.04731	2.04956	1.97209
EIF2S3	1.98573	0.564709	-0.758052
EIF4ENIF1	1.8845	2.32622	1.65765
EIF4H	-0.263718	0.250127	-0.119535
ELOVL6	0.525377	-0.554697	0.19285
ELP6	-0.167	-0.053361	-2.11646
ENAH	3.71054	2.05788	2.1708
ENSA	0.990349	-0.0421033	-0.131288
ENY2	0.439267	-0.121434	-0.160588
EPB41L5	0.205241	0.209004	-0.228608
EPC1	2.41878	1.67391	1.63759
EPHB2	0.401049	-0.100243	2.6454
EPS8	1.12186	0.573686	-0.0410228
ERCC6L2	1.70293	-0.482059	0.326524
ETFDH	0.632905	1.25258	0.266916
EXOC6B	-0.0690029	-0.0690396	-0.035803
FAF2	3.37529	1.1273	2.1271
FAM120A	1.36533	0.375603	0.125971
FAM149B1	0.115242	0.523664	-0.743578
FAM198B	-0.606448	1.07933	-0.590829
FAM208A	0.800005	0.515458	0.53417
FBLN1	0.546198	0.23337	0.0867467
FBN1	1.89346	0.414795	0.949544
FBRSL1	0.422098	0.190172	0.773672
FBXL17	1.11093	2.36352	2.07789
FBXO11	-0.704925	-0.35376	0.333046
FBXO3	1.82607	1.75466	1.59203
FBXO32	1.03084	3.28398	2.5362
FBXO4	1.67122	2.34768	0.183082
FBXW11	1.7091	0.948983	0.233501
FGFR1OP2	0.451928	-0.0526271	0.0923773
FGGY	1.46366	-0.355595	0.454324
FLRT2	1.34842	1.22838	0.792701
FN1	-0.948487	-0.439672	-0.533151
FNBP1	0.0901101	0.43593	0.675092
FNDC3A	1.59074	0.839725	1.43153
FRA10AC1	0.468626	0.771667	-0.0620244
FRMD6	0.817219	0.706666	0.574441
FSTL1	0.0161036	0.212267	-0.0817865
FTO	0.913702	0.170546	1.5668
FUS	-0.677784	0.0762009	0.200449
FXR1	0.0258875	-0.127543	-0.25253
GABPB1	1.01639	-0.748222	-1.16397
GALNT7	-1.22758	-0.356488	-0.721313
GART	-0.452588	0.118902	0.010145
GCFC2	0.353447	-0.480517	0.168064
GDAP2	-0.0728957	0.215613	-0.104926
GGNBP2	-1.19325	1.31697	0.485928
GGT7	0.364078	0.207825	0.243831
GID8	0.84669	0.839526	0.893637
GIGYF2	0.255871	0.603598	0.330078
GLOD4	1.2402	1.68318	1.06116
GLRX3	-0.136354	0.282983	0.186599
GLS	-0.810469	-0.843528	-0.520109
GLYR1	3.67806	1.22092	4.9362
GMCL1	-0.376664	-1.11569	-0.395206
GMDS	0.32435	0.949576	0.452497
GNAO1	1.54302	-0.0276565	0.825153
GNB1L	0.12706	0.53288	0.499092
GORASP2	0.249567	0.232552	1.01994
GPATCH2	-0.254312	-0.711821	-0.390831
GPCPD1	-0.337392	-1.95415	-0.517473
GPNMB	-0.775104	0.0265686	-0.179234
GPR137C	6.40846	3.81139	3.55025
GPR176	0.788441	0.670084	1.31071
GPSM2	0.648407	0.266753	0.0984808
GSTCD	4.74056	2.08576	2.70708
GSTO1	-0.102061	-0.077021	0.0925706
GSTO2	-0.564841	0.378981	0.00353926
GTDC1	0.484916	0.511118	0.561314
GTF2H1	0.162224	0.300412	-0.0224226
HBS1L	1.50838	1.27535	1.13092
HDAC4	5.64948	4.873	5.42704
HECTD4	2.01556	3.36506	3.2274
HELQ	-0.55932	-3.33569	0.513311
HERPUD2	0.303806	0.338621	0.240047
HIST1H2BD	0.86678	0.372261	0.403745
HMG20A	0.540534	0.824203	0.644002
HMGA2	1.78991	0.580125	0.35026
HNRNPA2B1	0.797109	-0.0501944	0.163094
HNRNPC	0.0221034	1.48387	-0.315332
HNRNPDL	0.285436	-0.175575	-0.239302
HNRNPLL	2.08848	1.75937	1.93172
HNRNPR	-0.821455	0.0736272	0.235985
HNRNPU	0.05403	0.19756	0.576873
HPS1	0.437423	0.300466	0.0133513
HSP90AA1	4.8615	4.16837	3.02904
HSPA14	-0.987208	-0.798655	-0.338231
HSPA4	2.82799	1.86379	1.86949
HTATIP2	0.673228	0.432726	0.71692
HTRA3	-0.262117	-0.15831	0.193644
HUWE1	2.03773	2.34259	1.8933
IDI1	0.410591	0.0415097	-0.0832119
IFT57	-0.191834	-1.35403	-0.763433
IGF2BP2	0.97487	0.340634	1.47713
IGFBP7	0.363376	-0.536588	-0.011456
IGSF1	0.0362326	-0.313246	0.223954
ILF3	-0.22688	0.12662	-0.121851
IMMT	0.196935	0.323254	-0.349589
IMPA2	2.34013	2.08558	2.07062
INSIG1	0.376846	0.226579	-0.140838
INSR	-1.78822	-0.944179	0.790952
INTS10	0.826497	0.786366	0.330687
INTS6	-0.108194	-0.14342	0.311281
INTS7	0.253978	0.608357	0.367433
IQCK	6.37957	3.4419	2.34849
IRS1	0.00152597	0.0277399	-0.000228868
ITPR3	-0.35816	0.613378	-0.791948
IVNS1ABP	-0.892288	0.799102	0.336791
JADE1	-0.637519	-0.423917	-0.248759
KALRN	-0.235459	-0.140419	0.0672631
KAT14	-0.1023	0.149448	-0.10701
KAT8	0.163772	1.16573	0.47486
KBTBD2	1.96122	1.52301	0.652068
KCTD1	-0.207726	0.976364	0.336708
KCTD13	2.76641	3.66434	2.79032
KDELR2	1.93183	1.1783	1.16526
KDM1A	-0.272388	-0.727506	-0.321967
KDM4A	0.174048	0.650892	-0.0279729
KDM5A	-0.472272	-0.0367522	2.2471
KIAA1217	1.49683	0.891112	0.879326
KIAA1324L	0.464578	-0.0312251	0.309851
KIAA1958	0.211714	0.619985	0.0712406
KIF16B	0.731666	0.0698636	0.366474
KIF2A	-0.18661	0.900152	-0.620089
KLF3	3.12233	2.64747	1.92572
KLF7	1.01561	0.0516442	2.18197
KLHL36	-0.10665	0.719652	0.304852
KMT2E	3.56766	1.50892	1.71682
KMT5B	-0.652731	-0.708271	-0.912688
KTN1	-0.0275254	0.157145	-0.731301
LACTB	0.426128	0.730741	0.243851
LAMP2	1.52779	1.85068	0.689016
LARGE1	-0.762269	1.40217	0.489891
LATS1	0.860167	1.08334	0.509688
LHFPL4	1.50493	0.770471	1.87213
LMNA	0.547031	0.0595053	0.245876
LNPK	-0.334461	0.155468	0.295217
LOXL1	3.02802	2.82127	2.96031
LRP1	-0.768187	0.0298989	0.41392
LRPAP1	0.0652151	0.0458898	0.14195
LRTOMT	0.152555	-0.587352	0.474281
LSM14A	1.52931	0.788738	0.802441
LTBP2	-0.528397	-0.0901011	1.00443
LYST	1.27021	0.19808	0.569114
MACROD1	0.193369	0.885644	3.75597
MAP3K20	-0.119885	0.285743	0.286237
MAP3K7	-1.88028	-1.19274	0.941436
MAP4	-0.0297943	0.370668	0.609597
MAP7D3	-0.0756697	0.150891	-0.0728296
MAPK8IP3	2.89134	0.454917	0.295845
MARK1	0.304887	-0.618091	-0.364462
MBD2	0.516294	0.07033	0.235138
MEGF11	-0.490473	0.0534406	-0.345277
MET	0.700228	-0.853051	-0.332087
METTL5	0.130609	0.154846	-0.047294
MEX3C	2.12698	2.38946	0.0262979
MFAP3L	0.767133	0.0764394	1.18376
MFSD11	3.54117	1.57237	1.22023
MICAL3	0.0203669	0.89164	0.647232
MICU1	0.245796	0.576838	0.253674
MIER1	6.02281	4.24508	3.66027
MINDY3	0.345793	-0.384188	-0.359559
MIPOL1	0.159062	-0.0200853	0.419112
MKLN1	4.51212	2.65682	2.43977
MKRN1	0.751978	0.518998	-0.685488
MMD	1.36233	1.68297	1.58664
MMS22L	0.385279	-0.227767	-0.314616
MORN2	0.393621	-0.607805	-0.720669
MRM1	2.24148	1.79112	2.02336
MRPS14	0.349458	0.448948	0.695085
MRPS6	1.00513	0.261643	0.0109708
MSI2	-0.566687	1.06522	1.18459
MSL1	0.279265	-0.154139	-0.327782
MTBP	1.70857	2.24152	1.27101
MTF1	1.22033	0.760736	0.611267
MTHFD1	0.251935	-0.189286	0.776425
MTOR	-0.547572	-0.448796	-0.289782
MVK	0.263197	0.280188	0.696138
MVP	0.0576193	-0.433609	0.245525
MXRA7	-0.338719	-0.468946	-0.529352
MYCL	0.485574	-0.500587	0.0247184
MYH9	-0.0905556	-0.231551	-0.456098
MYO18A	0.98025	-0.615356	0.529909
MYO19	0.130677	-0.346592	-0.116508
MYO1D	3.43029	2.83769	2.82879
MYO5A	-1.3969	-0.940217	0.617471
NAA60	3.60216	2.25579	2.87594
NARF	0.234869	0.00715921	0.797403
NBEAL1	0.484297	-3.37879	-0.387635
NBR1	-0.114172	-0.0735407	0.445748
NCAM2	-2.25284	0.362395	-0.396452
NCDN	-0.586299	-0.199086	0.693523
NCOA5	2.00882	1.80863	2.02
NCOR1	-0.264767	0.240961	-0.289262
NDFIP1	0.113242	0.974836	0.095085
NDUFB6	0.454949	0.153448	-0.821367
NECAP2	1.59797	1.87235	0.134954
NECTIN2	-0.0479173	-0.00342733	-0.202209
NEK1	-0.111659	0.168174	1.06948
NEK9	2.92439	2.32767	2.54113
NFE2L1	-0.518296	0.066965	-0.759415
NFE2L2	1.10382	0.128879	0.281682
NIN	0.501201	0.461563	0.193817
NISCH	0.25829	0.281657	0.0537843
NLK	3.1397	-0.570467	0.587897
NOVA1	0.795166	1.60624	0.867764
NPHP1	-2.9013	0.400066	0.027194
NRP2	0.683619	-0.269004	0.358312
NSD1	-0.559618	0.16121	-0.175244
NSD2	1.0293	1.28075	1.37865
NSD3	-0.0859737	0.644606	-0.0872432
NSMCE2	-0.0619628	1.17456	0.229876
NTRK2	-1.11196	-2.0411	-0.0982406
NUCB1	0.392579	0.304851	-0.328684
NUCKS1	7.56214	4.23608	3.77357
NUDCD1	0.893979	-0.161719	-0.767797
NUDT6	3.59193	2.5773	3.44279
NUP155	-0.323961	0.285843	0.254552
NUP58	0.168301	0.514479	-0.468661
NUP98	-0.628508	-0.0339627	-0.269841
NUPL2	2.50327	1.41414	1.86932
NXN	1.444	1.34302	0.994511
OCIAD1	0.442703	0.0231088	0.115981
ODF2	0.117279	0.331807	0.797962
OGDH	0.958906	0.734307	0.747037
OGG1	0.0280917	-0.354017	0.229017
OLA1	-0.0939618	1.83881	0.257131
OPTN	0.30157	-0.0912904	0.358176
ORAOV1	2.86942	1.8739	2.12344
ORC3	0.604303	-0.169319	0.86523
OSBPL10	-0.643053	-0.0886942	-0.952238
OTUD7B	4.67624	1.277	3.20762
OTULIN	-1.48667	1.17878	-0.15722
OXR1	1.66475	1.58545	0.649202
P4HA1	2.55885	2.84513	3.13406
PAFAH1B1	0.572088	0.64586	0.714915
PAM	0.990648	0.610353	0.0711799
PAN2	0.365592	-0.223357	0.213635
PARD3	-0.738191	0.0632764	0.135248
PATJ	-1.49759	-0.189251	-0.329831
PATZ1	0.315429	-0.234896	-0.0753776
PBLD	2.76122	2.57122	2.9415
PCDH9	0.631658	1.01628	-0.201306
PCF11	5.61242	4.34077	3.6594
PCIF1	0.498368	0.62341	0.233906
PCLO	-0.496892	-1.05744	-0.116989
PCNX2	0.652904	-0.592129	0.870013
PCOLCE2	1.38759	1.13739	1.32785
PDHX	0.675443	-0.826661	0.192838
PDLIM5	2.09048	0.788173	1.86194
PDSS1	-0.221891	-0.409539	-0.892457
PEX6	4.03116	3.55609	2.62944
PHF10	0.462902	0.740459	-0.271989
PHF19	0.628767	0.355351	0.401371
PHF20	1.83151	0.925322	1.29103
PHF20L1	0.062754	0.143295	-0.709664
PHF3	0.225909	0.103123	-0.0796751
PHIP	0.407145	-0.714222	-0.225694
PHLDB2	0.277711	-0.0147306	0.31545
PI4K2B	2.89772	2.38172	3.93996
PIANP	-0.31641	0.317168	0.399115
PIGL	1.78751	2.15119	2.06054
PIGQ	1.85773	1.39984	0.986924
PITPNM2	-0.00652721	0.164259	-1.559
PLEKHA6	-0.205993	0.491856	0.250359
PLEKHO1	1.01772	-0.00173687	-0.404177
PLK4	-0.374689	-0.852275	1.03711
PLPBP	3.28462	2.33201	1.80193
PLS3	-1.26212	0.506394	0.352549
PML	0.42128	0.278974	0.00155035
PNKD	1.08946	0.979098	0.973663
POLE2	-0.963391	0.398273	0.159071
PPA2	0.647354	0.134485	0.345371
PPARD	0.258645	1.25223	0.0821697
PPARG	-1.2825	-1.6949	-1.22616
PPM1A	-0.0541925	-0.0880116	-0.125125
PPM1B	-0.226387	0.325856	-0.602323
PPM1E	3.94145	3.73243	3.42159
PPME1	-0.71977	0.0711194	4.20511
PPP1R3F	4.09567	3.76655	3.20317
PPP2R5C	0.485821	-0.117553	0.453068
PPP2R5E	-0.874131	0.293087	0.136656
PPP3CB	0.0468258	0.469906	0.309221
PPP4R3B	0.255818	0.233443	0.34825
PRDM10	3.92275	3.44671	3.16142
PRDM2	-0.695285	-0.491737	0.21165
PRDM5	0.2987	-1.66416	1.47649
PRICKLE1	3.34565	2.57961	2.48755
PRKAR2A	4.38211	3.73852	3.0695
PRKCE	2.66968	0.664359	-0.120749
PRPF19	0.202641	0.986351	0.49847
PRRX1	-0.649446	-0.857023	-1.30614
PSIP1	2.09963	1.95275	2.04912
PSMD14	-0.762364	0.939345	0.895921
PTEN	1.01872	1.30552	0.714807
PTK2	0.0244471	0.0546729	0.176984
PTPN1	0.252403	0.0837916	-0.172988
PTPRK	-0.265547	0.254559	-0.0370569
PUM3	0.371551	-0.706395	-0.432734
PWWP2A	0.288485	0.0913395	0.47199
PYGB	1.26467	2.15867	1.14057
RAB21	0.443121	0.00563615	-0.0363106
RAB31	1.28842	1.61463	1.76968
RAB3GAP1	2.27845	1.05424	1.44094
RABGAP1L	-1.86347	0.139608	-0.0932743
RABL6	2.63244	2.71478	2.44666
RACGAP1	0.216528	0.186863	-0.671928
RAD1	0.740747	-0.334151	-0.939378
RAD23A	1.82056	2.7473	2.22842
RALGAPA1	1.5461	0.620124	0.797432
RAP2A	1.66764	0.985769	1.05428
RBBP4	0.804956	0.468906	0.316331
RBBP6	0.392606	1.14741	0.767315
RBFOX2	-0.0620721	-0.403527	-0.385122
RBKS	6.519	5.53819	4.78974
RBM4B	-0.540948	-0.189338	-0.348915
RCOR3	0.348071	-0.165812	-0.223349
RECQL5	1.07056	-0.365889	1.61765
REEP1	-0.307594	-0.406925	0.657353
REV1	0.87002	0.811252	0.128695
RFT1	-0.187711	-0.832301	0.841019
RFX2	1.00762	0.531023	0.107813
RIPOR2	0.0286992	-0.709587	0.140393
RNASEH2B	0.122417	0.636204	0.323091
RNF19A	0.935988	0.550164	1.06947
RNF220	-0.686092	-0.617959	-0.98559
ROBO1	0.556955	1.12663	1.98013
RPGRIP1L	0.994914	-1.1391	-0.683626
RPL23	-0.461615	0.194112	0.489534
RPL30	-0.259789	0.0808361	-0.219354
RPL36A-HNRNPH2	0.28598	0.00894026	-0.188064
RPRD1A	1.5287	1.48089	1.28538
RPUSD2	1.69142	1.12992	1.1335
RRP1B	1.58532	0.817343	1.43534
RSBN1	-1.44189	-0.0435988	-0.585849
RSPRY1	-1.19519	0.0793731	-0.44331
RSU1	0.337339	-0.108885	1.11506
RUNX1	0.56648	1.14309	0.396173
SAMD4A	0.313647	2.19287	1.78818
SAMD4B	0.0481827	0.573217	0.0204876
SAMM50	-0.118113	0.173711	0.122059
SBF2	0.823351	-0.128836	0.478081
SCAF4	0.455973	0.830138	0.172806
SCN5A	0.124685	-0.154277	-0.246202
SDCCAG3	0.286171	0.328447	-0.241256
SEC14L1	2.74312	1.86554	2.05606
SEC22A	1.35104	0.312433	1.57186
SEC31A	1.95487	2.4894	2.15326
SENP7	-0.847622	0.865716	-0.685232
SEPT10	-0.263966	-1.47507	-0.293445
SEPT11	0.446232	-0.128325	-0.319424
SERF2	0.248747	-0.00399458	-0.244151
SETDB1	-0.884824	-0.77877	-1.06311
SGPP1	3.65006	2.80956	2.45179
SH3KBP1	-0.242138	-0.407423	0.315471
SHF	0.398213	3.32036	1.61021
SIAE	-0.476379	2.07895	1.646
SKA2	0.102985	-0.0206975	-0.181351
SKI	0.457321	1.69409	-0.29299
SLC1A4	1.21436	-0.58029	-0.274116
SLC25A1	-0.353673	-0.481903	0.248371
SLC30A9	0.666511	0.938838	-0.433677
SLC31A1	2.31027	1.20034	1.05527
SLC35B4	0.45689	1.45111	1.19087
SLC44A1	-0.596337	-0.163898	0.130816
SLC6A15	-0.659289	0.609781	-0.53417
SLC6A6	0.65351	-0.494425	-0.622818
SLC7A1	-0.0192091	0.876355	0.221035
SLF2	5.49361	3.76833	3.44386
SLMAP	0.743201	1.02366	0.80643
SLTM	-1.24704	-0.0171246	-0.246541
SMAD3	4.36215	2.01947	1.90219
SMAD5	-0.416381	0.21062	0.0108276
SMNDC1	-0.420001	0.230639	-0.0882595
SMS	-0.427778	0.156327	0.0904017
SMURF2	-0.708245	0.576545	-0.500305
SNTB2	0.528442	0.841189	0.740966
SNX24	0.591381	0.574025	0.398503
SNX5	1.1185	0.662244	1.12434
SON	0.180486	-0.201339	0.277655
SPAG9	-0.767265	0.449747	0.217064
SPATA24	1.84251	1.69269	1.23655
SPEG	0.346848	0.216139	0.0906462
SPEN	3.33047	2.56076	1.78064
SPG21	-0.224313	-0.692091	0.0673722
SPIDR	0.918587	0.105272	-0.13449
SPTAN1	4.57362	0.371303	-1.05807
SPTB	0.60806	0.227081	0.307255
SPTBN1	-0.233172	-0.627116	-0.427397
SRCIN1	0.590124	0.776267	0.251718
SRGAP2	0.481245	-0.055984	0.550122
SRRT	-0.235141	-0.280492	0.519912
SSFA2	0.339723	0.149865	0.0376433
SSPN	3.24344	1.83031	2.14749
SSR3	-0.172304	0.228907	-0.262103
ST3GAL3	5.56078	3.37863	3.34482
ST8SIA1	1.84507	1.58847	1.06519
STAG1	-0.130934	0.0169855	0.0323305
STARD3NL	0.210082	0.824497	0.46402
STAT3	1.57424	0.886936	1.29946
STAU2	-0.107201	-0.668824	-0.199757
STRADB	3.65646	2.63351	3.01303
STX8	0.341796	1.47667	0.729164
STXBP1	0.597056	0.412327	-0.409287
SUPT16H	2.49093	1.50852	1.96866
SYCE1L	-2.2921	-1.8497	-1.78811
SYNGR1	0.422693	0.169876	-0.0403979
SYNPO	0.482029	0.0246024	0.271765
SYNRG	-0.963825	-0.274965	-0.0846077
SYPL2	2.77498	1.14395	2.51794
SYT12	1.6933	1.60522	1.72067
SYT17	0.231001	0.917612	0.489193
TAF5	-0.128134	-0.166054	0.567174
TAPBP	2.3534	2.75994	2.99341
TATDN1	1.23671	0.647992	0.747697
TAX1BP1	-0.454614	0.18539	-0.385571
TBC1D24	-1.67457	0.0519892	0.246091
TBC1D31	3.0555	1.99273	2.36898
TBP	0.121175	0.780547	-0.406418
TCAF1	5.82112	2.9043	2.21776
TCEA2	0.811297	0.646967	0.872971
TCFL5	0.204809	0.194228	0.847889
TCOF1	-0.301271	-0.6591	-0.206583
TCTN3	0.326792	0.074878	0.522925
TDRD3	0.154704	0.190484	-1.56802
TERF2	-0.345044	-0.79186	-0.00684065
TFDP1	0.512015	-0.0421047	0.0958606
THAP2	4.8479	3.62014	3.11955
THEM4	0.333202	1.92532	1.92611
THRA	-0.147743	0.261376	0.252063
THRAP3	-1.74652	1.51138	-0.126233
TKT	0.173801	0.177872	0.274804
TLN2	-0.548642	-0.250782	-0.0750363
TM9SF2	0.846848	-0.37859	-0.231978
TMEM159	0.887742	1.18015	1.3393
TMEM241	-1.14192	-1.70985	0.425259
TMEM242	2.61019	3.3195	2.91408
TMEM260	3.87797	3.01411	2.82992
TMEM44	1.79563	0.500933	0.335154
TMEM45A	0.37765	-0.226209	-0.874462
TMEM56-RWDD3	0.0473115	-0.200782	-0.229191
TMEM98	0.295841	-0.022264	0.36017
TMPO	-0.223407	-0.539885	-0.352732
TNRC18	0.124886	0.15525	0.343786
TOB2	2.55265	1.43255	2.08869
TOM1	2.44732	2.00337	0.865077
TOP1MT	0.487231	-0.0525332	0.884213
TPM1	0.80692	-0.133946	0.664559
TRAK1	-0.899827	-0.461965	-0.0337973
TRIM66	-1.67037	-0.791176	0.112359
TRIM9	1.23596	-0.176241	1.38561
TRIOBP	0.196715	0.159718	0.235246
TROAP	-0.375495	-0.528615	-0.331485
TRPM4	2.87199	2.73197	3.23075
TRRAP	3.06438	2.65314	2.13067
TRUB1	0.3342	0.038401	0.580626
TSPAN14	1.19375	0.525754	0.770628
TTC13	3.77739	3.14405	3.05355
TTC17	-0.230083	-0.456142	0.152236
TTC3	0.401209	1.02931	0.425346
TTC39C	0.027083	0.0817169	-0.340337
TTC7B	-0.261391	0.660855	-1.30372
TTLL11	0.217154	3.67539	2.88833
TUBGCP4	0.172333	-0.528202	0.75639
TXNDC5	0.0877305	-0.209162	0.0596823
TXNRD2	0.366221	0.316733	0.131302
U2SURP	0.754168	0.366291	-0.323854
UBAC2	-0.166435	0.0681016	-0.656971
UBAP2L	-0.885467	-0.569022	0.378703
UBE2D4	0.263006	-0.712605	0.824749
UBE2V2	4.44985	4.09059	3.73371
UBE3A	1.11903	1.00151	1.0201
UBE3C	0.0853354	0.381513	-0.564149
UBE4B	-0.24551	0.104808	0.794167
UBR4	5.27577	4.05882	3.50702
UCHL5	3.17228	-0.672974	1.20461
UNK	0.76392	1.12379	1.42376
UPF2	0.843874	0.0385386	0.393412
UQCRC2	0.196393	-0.424549	-0.119706
URGCP-MRPS24	-0.299584	-0.184017	-0.0997278
USP15	-0.155376	-0.784839	-0.475471
USP47	1.91552	-0.56007	-0.320354
USP48	-0.842094	-0.147702	-0.0495776
UST	-0.113061	-0.287658	-1.25021
VIM	-0.26183	-0.227807	0.349902
VPS13A	-0.527107	0.123725	-0.0790881
VPS37A	-0.807828	-0.299871	-0.529405
VTI1A	-0.0481988	0.460831	0.555671
VWA8	0.389163	0.225866	-0.146155
WASHC5	-0.723849	-0.145817	-1.89084
WDR11	1.08731	0.457525	-1.31333
WDR33	0.555436	0.21501	0.128061
WDR43	0.381755	0.403575	1.21196
WDR76	1.30445	0.605266	-0.532477
WIPI1	-0.383394	0.452795	0.0889932
WTAP	0.708707	0.209783	-0.0979807
WWC2	1.05957	0.357329	-0.497058
WWOX	-0.764262	0.431306	-0.145232
WWP1	0.283639	0.72504	-0.026
XPNPEP3	2.41025	1.08801	2.15034
YARS	0.37154	1.53978	0.942085
YLPM1	0.624234	0.925182	0.622576
YTHDC1	-1.37178	-1.4823	-1.62034
ZADH2	1.91165	0.906094	2.0452
ZBTB1	0.332399	0.484282	0.740503
ZBTB24	0.916715	0.707497	0.109384
ZBTB46	0.275724	0.557985	2.02016
ZC3HAV1	0.726418	-0.504785	0.539432
ZDHHC1	2.3018	3.15306	1.99796
ZDHHC14	2.01004	1.44579	1.54786
ZER1	1.38616	1.93097	0.882107
ZFPM1	4.21758	3.90575	3.002
ZFR	0.235507	-0.214072	0.536544
ZHX2	-0.0473665	1.08797	0.1472
ZMYM4	-1.88575	0.0837768	-1.01496
ZNF106	0.984204	-0.397813	-0.644228
ZNF202	1.52753	1.63141	1.32068
ZNF263	0.00799066	0.289259	0.295812
ZNF280D	2.2291	2.11004	2.66539
ZNF606	3.95955	2.06299	2.56398
ZNF638	2.5217	1.6636	1.82821
ZNF652	-0.19161	-0.590273	-0.189318
ZNF654	0.600964	-0.923071	-0.623585
ZNF746	-0.50259	-0.76508	-0.086897
ZNRF2	0.103909	-0.69656	-0.547992
ZSWIM7	1.51144	2.42006	2.27624
ZWILCH	1.42587	0.134639	0.456016
